RESEARCH ARTICLE

# Skin mucosome activity as an indicator of *Batrachochytrium salamandrivorans* susceptibility in salamanders

Hannah Keely Smith<sup>1</sup>, Frank Pasmans<sup>1</sup>, Maarten Dhaenens<sup>2</sup>, Dieter Deforce<sup>2</sup>, Dries Bonte<sup>3</sup>, Kris Verheyen<sup>4</sup>, Luc Lens<sup>3</sup>, An Martel<sup>1\*</sup>

**1** Wildlife Health Ghent, Department of Pathology, Bacteriology & Avian Diseases, Ghent University, Salisburylaan, Merelbeke, Belgium, **2** Laboratory for Pharmaceutical Biotechnology, Ghent University, Faculty of Pharmaceutical Science, Ottergemsesteenweg, Ghent, Belgium, **3** Terrestrial Ecology Unit (TEREC), Department of Biology, Ghent University, K. L. Ledeganckstraat, Ghent, Belgium, **4** Forest & Nature Lab, Department of Environment, Ghent University, Geraardsberge Steenweg, Gontrode, Belgium

\* [An.Martel@ugent.be](mailto:An.Martel@ugent.be)

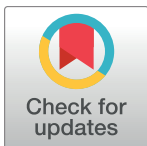

**OPEN ACCESS**

**Citation:** Smith HK, Pasmans F, Dhaenens M, Deforce D, Bonte D, Verheyen K, et al. (2018) Skin mucosome activity as an indicator of *Batrachochytrium salamandrivorans* susceptibility in salamanders. PLoS ONE 13(7): e0199295. <https://doi.org/10.1371/journal.pone.0199295>

**Editor:** Stefan Lötters, Universitat Trier, GERMANY

**Received:** November 10, 2017

**Accepted:** June 5, 2018

**Published:** July 18, 2018

**Copyright:** © 2018 Smith et al. This is an open access article distributed under the terms of the [Creative Commons Attribution License](https://creativecommons.org/licenses/by/4.0/), which permits unrestricted use, distribution, and reproduction in any medium, provided the original author and source are credited.

**Data Availability Statement:** All data are available in the manuscript and Supporting Information files.

**Funding:** Financial support for this research was provided via the University of Ghent GOA project Scaling up Functional Biodiversity Research: from Individuals to Landscapes and Back (TREEWEB) to Hannah Keely Smith.

**Competing interests:** The authors have declared that no competing interests exist.

## Abstract

Recently emerged fungal diseases, *Batrachochytrium dendrobatidis* (*Bd*) and *Batrachochytrium salamandrivorans* (*Bsal*) are an increasing threat to amphibians worldwide. In Europe, the threat of *Bsal* to salamander populations is demonstrated by the rapid decline of fire salamander populations in Germany, the Netherlands and Belgium. Although most European urodelans are susceptible to infection in infection trials, recent evidence suggests marked interspecific differences in the course of infection, with potentially far reaching implications for salamander conservation. As a salamander's skin is the first line of defense against such pathogens, interspecific differences in innate immune function of the skin may explain differential susceptibility. Here we investigate if compounds present on a salamander's skin can kill *Bsal* spores and if there is variation among species. We used a non-invasive assay to compare killing ability of salamander mucosomes of four different species (captive and wild *Salamandra salamandra* and captive *Ichtyosaura alpestris*, *Cynops pyrrhogaster* and *Lisso-triton helveticus*) by exposing *Bsal* zoospores to salamander mucosomes and determining spore survival. In all samples, zoospores were killed when exposed to mucosomes. Moreover, we saw a significant variation in this *Bsal* killing ability of mucosomes between different salamander host species. Our results indicate that mucosomes of salamanders might provide crucial skin protection against *Bsal*, and could explain why some species are more susceptible than others. This study represents a step towards better understanding host species variation in innate immune function and disease susceptibility in amphibians.

## Introduction

Wildlife diseases are an increasing threat to biodiversity [1,2]. Over the last two decades amphibian populations have declined due to recently emerged diseases [3–5]. Among them, fungal pathogens, such as *Batrachochytrium dendrobatidis* (hereafter *Bd*) and

*Batrachochytrium salamandrivorans* (hereafter *Bsal*), etiological agents of chytridiomycosis have been wreaking havoc on amphibian populations worldwide [6–12]. In Europe, *Bsal* emerged suddenly and severely, causing a population of fire salamanders to nearly collapse in the Netherlands, with less than 0.1% of the population remaining [13,14]. Similar population collapses occurred in Belgium [15] and have been found in Germany [16]. Probably originating in Asia [17,18] this pathogen may have a quick and devastating effect on most salamander species of Europe. The risk of further spread globally has caused proactive responses in the form of taskforces to emerge and trade restrictions to be implemented in the USA, Canada and Switzerland [19,20].

*Batrachochytrium salamandrivorans* differs from its sister species (*Bd*) in that the disease is limited to urodelans but, like *Bd*, the effect it has on its host differs greatly among but also within species [15,17,21]. Previous infection trial studies observed a range of host susceptibility, from highly susceptible (ie. fire salamanders *Salamandra salamandra*) to moderately susceptible (ie. alpine newt *Ichtyosaura alpestris* and Japanese fire belly newt *Cynops pyrrhogaster*) to resistant (ie. palmate newt *Lissotriton helveticus*) [15]. The differences seen in disease susceptibility could be partly the result of immune defenses, as these are known to vary among individuals and species [22]. In addition to host immune factors, susceptibility of amphibians to *Bd* has been attributed to many different factors including skin microbiota [23–25], genetic makeup of populations [26] and environmental factors [27,28].

Given the increasing threat of new pathogens to amphibians, understanding host immune function and susceptibility is increasingly important [22]. In amphibians, the first line of defense against chytrid pathogens is their skin [29]. As amphibians use their skin for a multitude of key physiological functions (e.g. chemical defenses, thermo- and osmoregulation) their skin is a particularly important organ, vulnerable to invading pathogens [30]. *Bd* and *Bsal* target and invade the amphibian's skin, thereby interfering with the skin's vital functions [31,32]. Therefore, understanding innate immune factors present on the skin of amphibians, and how this immune function varies between individuals and species is important.

Amphibian skin generally has two types of specialized secretory glands which help protect the skin. Firstly, granular glands produce defensive secretions that contain a cocktail of different bioactive molecules (i.e. alkaloids, TTX toxins, steroids, amines, antibodies, lysozymes and antimicrobial peptides) [29, 33–39]. The exact molecules vary widely among amphibians and are used for predator deterrence and host immunity. In many amphibian species, these glands are concentrated in large conspicuous structures [40] that release their poisonous content upon irritation, mechanical pressure, stress or adrenaline stimulation [41]. Besides releasing bioactive components when stimulated, studies have shown that the granular glands of non-stressed frogs also release such components into the mucous layer at low levels [42]. Secondly, mucous glands produce a mixture of mucin glycoproteins that make up the main component of the skin mucosal layer and can behave as a physical barrier to pathogenesis [29]. Additionally, the skin and mucous layer have been shown to harbor a community of microbiota (and their metabolites), believed to influence growth of pathogens [43–45]. Together the mixture of mucin glycoproteins, granular gland secretions [46] and the skin microbiota make up the mucosome [46,47].

Research on amphibian skin immune function focuses largely on frog species and the effect of AMPs which have been shown to reduce infection loads of *Bd*, in some cases allowing the animal to clear the infection [29,42,48–51]. The long history of research in skin secretions of salamanders has revealed a plethora of defensive compounds [52–54]. Within Salamandridae, several species produce alkaloids, namely samandarine and samandarone [34,37,55,56] and TTX toxins in their secretions [36,38,39]. However, comparatively few studies have shown the effect of salamander skin secretions against *Bd*, with a few exceptions [57–60]. Here we

investigate whether salamander mucosomes and skin secretions can affect *Bsal* and/or *Bd* spore viability using the vulnerable fire salamander as our main model. Additionally, we examined whether the innate immune function of the salamander's mucosome differs among host species in its killing ability of *Bsal*.

## Materials & methods

### Study animals and husbandry

To determine the extent to which fire salamander skin secretions and fire salamander, alpine newt, palmate newt and Japanese fire belly newt mucosomes are capable of killing *Bsal* zoospores, we sampled mucosomes from captive born and raised animals. All animals used were adults and randomly selected from their terraria or tanks. Fire salamanders, alpine newts and palmate newts were selected as they are all European species co-occurring in *Bsal* infected forests and have differing susceptibilities during infection trails. The Japanese fire belly newt was included as an Asian species suspected of being a *Bsal* carrier. Fire salamanders were housed in large mesocosms of 2.5 m by 1.25 m in groups of 10–15 animals with moist soil and dry leaves and clay tiles for shelter and kept at 8°C–15°C. Palmate newts, alpine newts and Japanese fire belly newts were housed separately in large glass tanks of 40 cm by 60 cm in groups of 10, on moist soil and dry leaves with clay tiles for shelter and kept between 15°C–20°C. For all animals, appropriate food (crickets, worms or bloodworms) was provided *ad libitum*. In addition, mucosomes of fifteen wild fire salamander were collected in November 2016 from Makegem- Harentbeek forest East Flanders, Belgium. A 54.24 ha private forest with 10 ponds (latitude 50.945331, longitude 3.714886). Animal experiments were conducted according to biosecurity and ethical guidelines set forth by the ethical committee of the Faculty of Veterinary Medicine, Ghent University. Ethical permission was not required under Belgian Legislation (Law 14 August 1986 related to the protection of animals). Permits for sampling of wild fire salamanders were granted by Agentschap voor Natuur en Bos of East Flanders in Belgium, license number ANB/BL/FF-V15-00015.

### Experimental procedure

Mucosome bathing was performed on all salamanders and newts as described in Woodhams et al. 2014 [46]. Each amphibian was rinsed prior to bathing, and its surface area was calculated according to Spight et al. 1968 (surface area in  $\text{cm}^2 = 8.42 * (\text{mass in g})^{(0.694)}$  and divide surface area by 4 to determine quantity of water to add)[61]. Animals were bathed in HPLC water for 1 hour and the wash solution was collected and frozen at -20°C until further analysis.

Fire salamander skin secretions were collected by massaging the granular glands with a microbiological inoculation loop rubbed over the dorsal tail. Collected skin secretions were weighed to the nearest 0.1 mg. Varying amount of skin secretions were collected per individual, ranging from 5 mg to 20 mg. To create a skin secretions suspension HPLC water was added to the sample at a ratio of 10  $\mu\text{l}$  of water to 1 mg of secretions. The samples were then sonicated in a sonication bath (Branson 2510 ultrasonication bath) for 15 mins (120V, 60Hz). Samples were frozen at -20°C until analysis.

We performed experiments in which we exposed *Bd* JEL 423 and *Bsal* AMFP 13/01 zoospores ( $10^6$  per mL) to the mucosome bathing solution or skin secretions (Palmate newt/Japanese fire belly newt  $n = 6$ , captive fire salamander/alpine newt  $n = 8$ , wild fire salamander  $n = 15$ ). *Bd* JEL 423 and *Bsal* AMFP 13/01 cultures were grown in flasks in TGHl (tryptone, gelatin hydrolysate and lactose) broth at 20°C and 15°C respectively. During sporulation, zoospores were harvested and filtered (filter size 10  $\mu\text{m}$ ) to remove sporangia. Spore concentration

was determined by haemocytometer count using lugol solution (Sigma) to stain zoospores. Zoospore suspensions of  $1 \times 10^6$  mL were used for all assays.

We used trypan blue staining to determine viability of *Bd* and *Bsal* spores after exposure to amphibian mucosomes or glandular gland skin secretions. The protocol was adapted from McMahon and Rohr 2014 [62].

The *Bd* or *Bsal* survival assays were performed by adding zoospore suspension to mucosome and skin secretion solution and incubating for 60 minutes. The number of viable *Bd* or *Bsal* zoospores in the zoospore suspension was determined before inoculation. HPLC water (treated as wash solution without the salamander) was used to provide a background survivability of *Bd* or *Bsal* spores, heat-killed spores were used as positive control. After incubation, the numbers of remaining viable zoospores were calculated using trypan blue dye (0.4% trypan blue in phosphate buffered saline). Viable spores were counted using a hemocytometer and compound microscope. All tests were performed blind and repeated in triplicate. Secretion samples were completely sterilized by one hour of UV radiation to eliminate possible effects of live bacteria in our experiments. Mucosome solutions were sterilized using 0.2  $\mu$ m filters.

We calculate the killing ability of each animal's skin defenses by comparing the (mean) viable chytrid spores after inoculation with mucosome (or secretions) versus the negative control (viable spores in water) to calculate the percent viable spores.

### Skin defenses components

To investigate the components responsible for the observed *Bsal* killing ability, we collected skin secretions of fire salamanders and mucosomes of alpine newts as described above, the latter were used as their mucosomes exhibited marked zoospore killing activity.

In order to investigate whether the bioactive compounds are large (high molecular weight) or small (low molecular weight) molecules, we separated components based on size using dialysis with different membrane pore sizes. Dialysis membranes (Spectra/Por Micro Float-A-Lyzer and Spectra/Por 6 Dialysis Tubing), size 50 kD were used per the manufacturer's instructions. Samples were loaded into the filter and spun for 16 hours at 4°C to remove smaller particles. The samples were then used to run the *Bsal* spore viability assay.

To test whether the active components could be proteins or peptides we denatured all proteins and peptides present in the secretions and mucosomes using Endoproteinase GluC (*Staphylococcus aureus* Protease V8, New England BioLabs), according to the manufacturer's instructions. Digestion of proteins/peptides was achieved by adding GluC Reaction Buffer to sample and Endoproteinase GluC for 16 hours at 37°C. The samples were then used to run the *Bsal* spore viability assay.

To examine the proteins present in fire salamander skin secretions (diluted 1:100) we performed SDS-PAGE (Sodium dodecyl sulfate polyacrylamide gel electrophoresis) Mini-Protean 3 Cell gel (Bio-Rad) with Brilliant blue G-Colloidal concentrate staining used by manufactures specifications (Sigma).

### Mass spectrometry

Further examination of fire salamander skin secretion proteins was done by in-gel digestion followed by high resolution LCMSMS analysis (Synapt G2Si, Waters) using HDDDA acquisition. Data was searched using an in-house Mascot Server against a Uniprot Amphibia library.

### Statistical analysis

All analyses were performed in SPSS version 24, and all data were checked for normality and equality of variance among groups prior to statistical analysis. A Student's t-test (normal

distribution) or Mann Whitney U test (non-normal distribution) was performed to examine the difference in viable *Bd* and *Bsal* spores after inoculation with the fire salamander mucosome and secretion. To test whether the mucosome killing-ability varies among species, we performed a one-way analysis of variance (ANOVA) followed by a Tukey (equal variances assumed) or Games-Howell (equal variances not assumed) post hoc test.

## Results

### Skin defenses function

Fire salamander skin secretions were shown to drastically reduce viable spores of *Bsal* and *Bd*, resulting in more than 80% spore mortality after one hour in both chytrid species (Fig 1A). *Bsal* and *Bd* spore mortality were not significantly different with 92.5% and 90.5%, respectively ( $U = 32, p = 1.00$ ). The mucosome of fire salamanders killed a substantial amount of chytrid spores (Fig 1B), however, reduction in viable *Bd* spores (54.5%) was significantly greater than *Bsal* spores (26.5%) ( $t = 4.4, df = 11, p = 0.001$ ). The killing ability of salamander secretions on both chytrid species was markedly higher than salamander mucosome solutions (compare Fig 1A to 1B).

*Bsal* spore mortality varied significantly between the mucosomes of the four different salamander species (ANOVA:  $F = 35.032, df = 3, 24, p < 0.001$ ) (Fig 2). The only two mucosomes that did not differ significantly in their *Bsal* killing activity were those of the alpine newts and palmate newt ( $p = 0.998$ ). These two species' mucosomes killed a significant portion of *Bsal* spores, with 77.6% and 78.9% spore mortality respectively. Captive fire salamander mucosomes killed the fewest spores with an average 20.7% spore mortality, while fire belly newts killed a higher percentage of spores (average of 45% spore mortality). These results correlate with the known susceptibility of these species when infected with *Bsal* during clinical trials [15,17]. To check if mucosome activity of captive fire salamanders is similar to that of wild fire salamanders, we tested the mucosome activity of 15 wild fire salamanders against *Bsal* zoospores. This resulted in an average *Bsal* spore mortality of 28.8%, which is comparable to captive fire salamanders mucosomes (Fig 2). Wild fire salamanders displayed a slightly larger variation in *Bsal* killing ability, ranging between 0 to 63 percent spore mortality, compared to 2 to 40 percent in captive animals.

### Protein analysis

Protein denaturation of fire salamander skin secretions resulted in a decrease in *Bsal* killing-ability, with a major decrease in spore mortality of 39.1% compared to the control treatment (Fig 3A). When samples were filtered with a 50 kD dialysis membrane (to remove smaller molecules), we didn't observe an apparent reduction in the killing activity of the secretions (Fig 3A). Similar effects were observed when testing the killing activity of alpine newt mucosomes after protein denaturation and dialysis (compare Fig 3A to 3B).

The banding pattern on SDS-PAGE gel used to examine proteins from the secretions, ranging in size from proteins at ~16 kD to ~250 kD. Prominent bands were seen at ~16 kD, ~70 kD, ~80 kD and ~250 kD. Proteins and peptides of a mass below 16 kD were not detected (S1 Fig).

Analysis of protein bands by LCMSMS resulted in tentative identification as mostly structural/cellular proteins. However, annotation results and further identification of candidate immune/defence proteins were inconclusive due to poor proteome coverage of our target species.

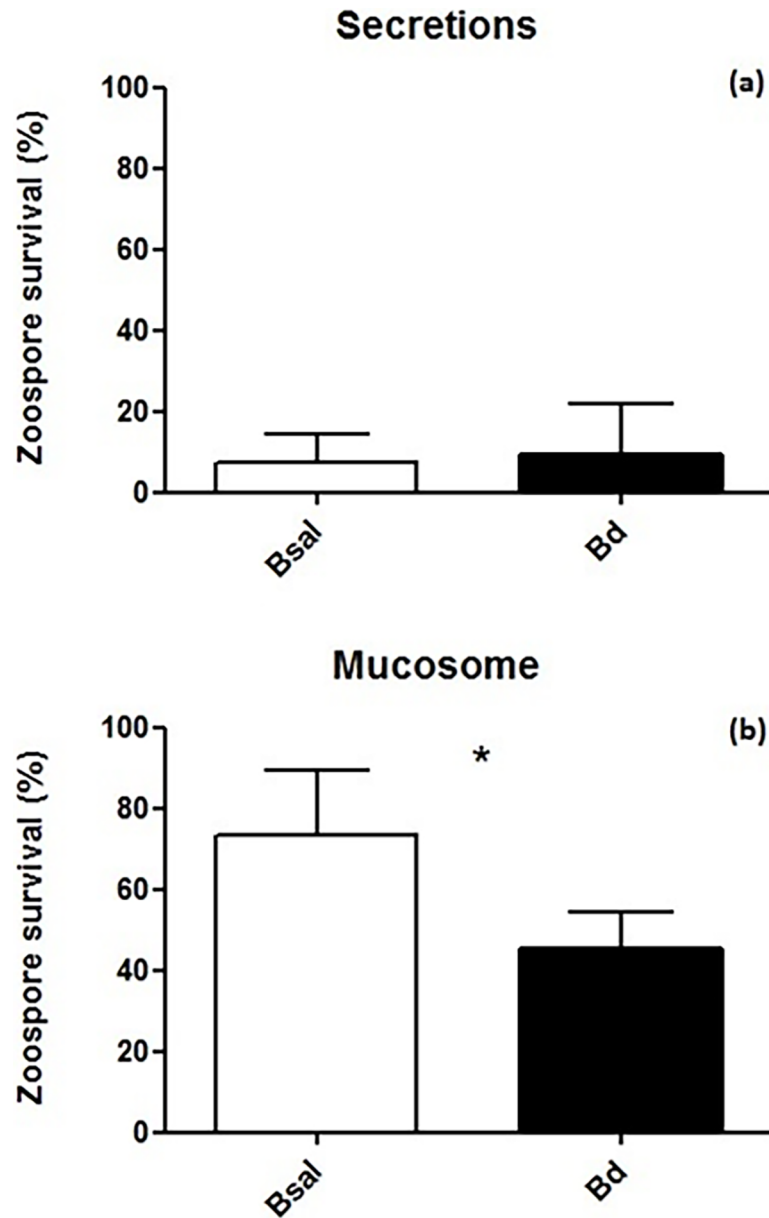

**Fig 1.** a) Fire salamander secretion killing activity versus *Bd* and *Bsal* zoospores. b) Fire salamander mucosome killing activity versus *Bd* and *Bsal* zoospores. Secretions (diluted 1:10) and mucosome of fire salamander (n = 8). Shown are the mean +/- SD of the percentage of viable zoospores observed after 60 minutes of incubation (compared with viable spores exposed to water). Asterisks indicate a significant difference at  $p < 0.05$ .

<https://doi.org/10.1371/journal.pone.0199295.g001>

## Discussion

As the surface of the skin represents the first contact between the amphibian host and its chytrid pathogen, the innate immune function of the skin is a key first step influencing subsequent disease dynamics. We found that components on urodelan skin can kill zoospores of both *Bd* and *Bsal*. Moreover, *Bsal* killing activity of the mucosome of different salamander's species reflect their known susceptibility.

Focusing on skin defenses of fire salamanders, skin secretions were found to be surprisingly effective in killing both *Bd* and *Bsal* spores with ten to hundred-fold dilutions of skin secretion



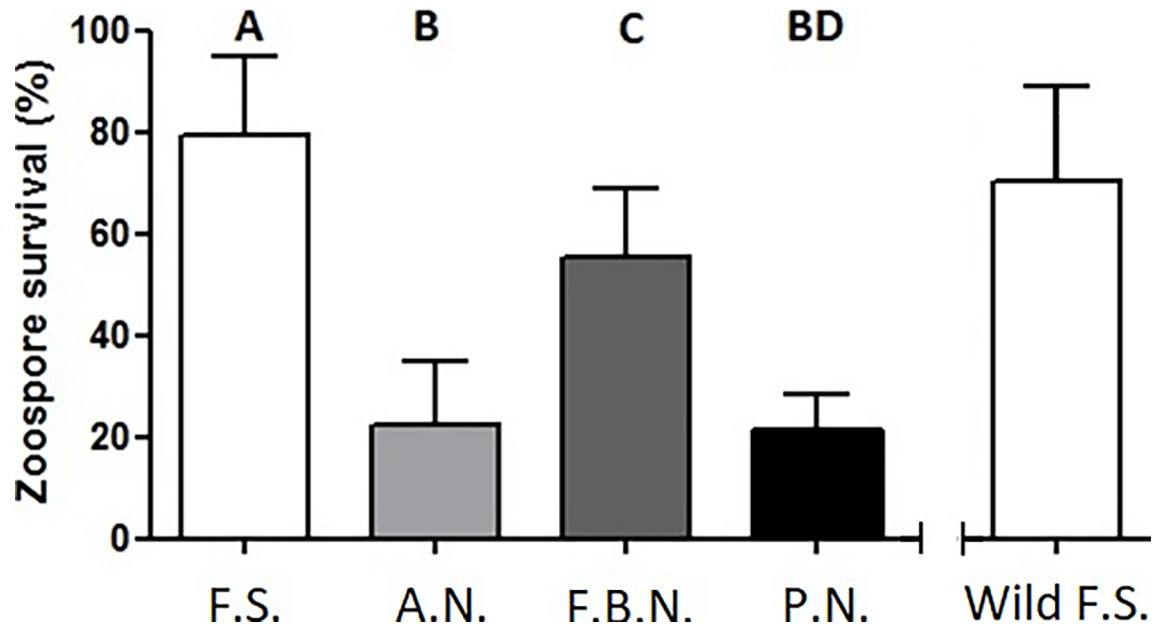

**Fig 2. *Bsal* zoospore survival after exposure to different species mucosomes.** F.S. = fire salamander (n = 8), A.N. = alpine newt (n = 8), F.B.N. = Japanese fire belly newt (n = 6), P.N. = palmate newt (n = 6). Wild F.S. are depicted for comparison but originated from a separate experiment (n = 15). Shown are the mean  $\pm$  SD of the percentage of viable zoospores observed after 60 minutes of incubation (compared with control, viable spores in water). F.S. vs A.N. (p < 0.001), F.S. vs F.B.N. (p = 0.011), F.S. vs P.N. (p < 0.001), A.N. vs F. B. N. (p < 0.001), A.N. vs P. N. (p = 0.998).

<https://doi.org/10.1371/journal.pone.0199295.g002>

samples killing the great majority of *Bsal* and *Bd* spores. On the contrary, mucosomes of both captive and wild fire salamanders are less effective at killing *Bsal* spores. This apparent difference between mucosomes and granular gland secretions could be due to the fact that active components originate from the secretions and are still present in the mucosome, but at a more diluted concentration. High quantities of secretions are only produced during irritation, mechanical pressure, stress or adrenaline stimulation [41,42]. Interestingly, fire salamander mucosome activity against *Bd* and *Bsal* reflects the differences in their susceptibility to these two chytrid species (Fig 1). Fire salamander are highly susceptible to *Bsal*, with 100% lethality of fire salamanders during infection trials [17], and field reports show that its effects in the wild are similarly lethal [14,15]. Conversely, *Bd* does not kill fire salamanders in clinical trials, but published data on this is lacking due to the difficulty in establishing *Bd* infection in the host. Furthermore, the only report of *Bd* having a lethal effect on fire salamanders originates from the Peñalara Natural Park, Spain [63].

Palmate newts are apparently resistant to *Bsal* during infection trials [17] and there have been no observations of wild palmate newts being infected even though these newts are found within environments where *Bsal* is present. The mucosome of this species killed three-quarters of *Bsal* spores in one hour. In addition to the highly susceptible fire salamander and the resistant palmate newt we tested two moderately susceptible species, alpine newts and Japanese fire belly newts. The effect of *Bsal* on alpine newts is dose-dependent. During infection trials with a high dose of *Bsal* the animals become sick and die [17], whereas when the dose is lower animals can recover and clear the infection [15]. Although there are some reports of infected alpine newts in the wild, prevalence is low (<10%) and no population declines have been observed [16] even when co-occurring with infected fire salamanders. While other factors could be at play, this suggests that a low infection dose of *Bsal* could possibly be more representative of natural disease dynamics.

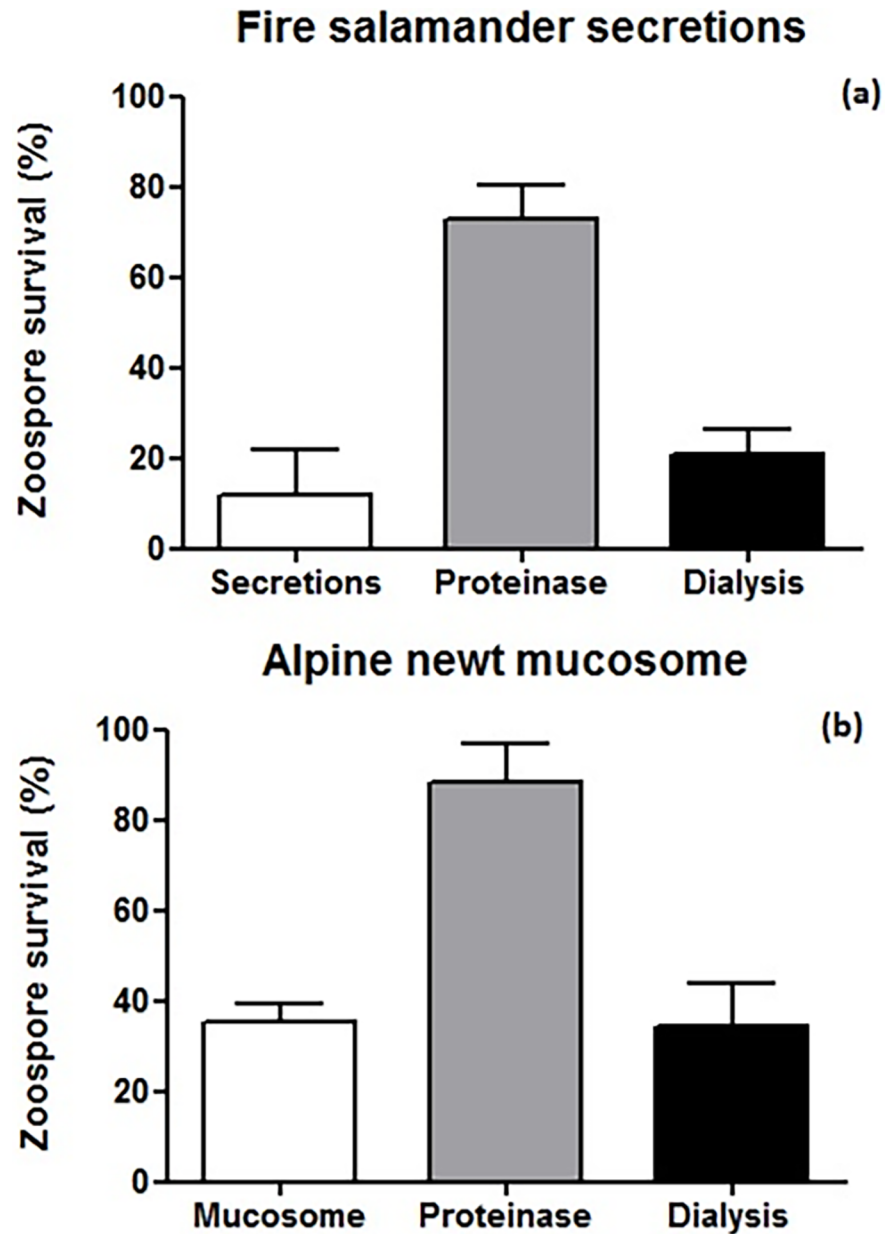

**Fig 3.** a) *Bsal* zoospore survival in the presence of treated and untreated fire salamander skin secretions. Pooled secretions (diluted 1:100, n = 3) b) *Bsal* zoospore survival with treated and untreated alpine newt mucosomes. Pooled mucosomes (n = 13). Shown are the mean +/- SD of the percentage of viable zoospores observed after 60 minutes of incubation (compared with control, viable spores in water).

<https://doi.org/10.1371/journal.pone.0199295.g003>

We show that the alpine newt mucosome kills larger amount of *Bsal* spores than the fire salamander, suggesting that the mucosomes aid the species in clearing the disease. We see a marked similarity in the mucosome activity of the alpine newt and palmate newt, but not in their susceptibilities. In infection trials *Bsal* has proven to be highly invasive in alpine newt skin but not in the palmate newt [17,64], suggesting that for the palmate newt, the skin itself could be playing a role in its susceptibility, in addition to the mucosome. The Japanese fire belly newt is moderately susceptible to *Bsal*, at high infection doses around half infected



animals die and half recover [17]. Here we found that the mucosome kills roughly half of exposed spores. Although it could be assumed that both the fire belly newt and the alpine newt should have similar mucosome killing activity, the statistical discrepancy between the mucosome function of these species can be explained. Firstly, by the large variation seen in alpine newt mucosomes (Fig 2 versus Fig 3B), secondly, although the killing activity of Japanese fire belly newts' mucosomes might not be as great as those of alpine newts, its susceptibility status could be due to more adaptive immune factors as a result of co-evolution with *Bsal* in Asia [18].

Previous work investigating skin defenses of amphibians against *Bd* has focused largely on frog species; their antimicrobial peptides [29,42,48–51] and their bacterial metabolites [65–69]. There is however, a rapidly growing body of work on skin microbiota of salamanders [70–72]. Furthermore, studies of *Plethodon* salamander skin bacterial metabolites have shown anti-*Bd* activity [73–76]. But a lot of questions remain in regards to salamander skin immune compounds, and their activity against the newly emerged *Bsal*.

Surprisingly, our data indicate that the active anti-chytrid molecules in both the secretions and mucosomes are proteins. Elimination of bacteria from the samples and removal of the low molecular weight fraction (small active molecules like bacterial metabolites) did not affect the ability to kill the spores. This suggests that the main active compounds are not the commonly studied bacterial metabolites, alkaloids or steroidal salamander toxins. Denaturing the protein fraction in both skin secretions and mucosomes drastically reduced the *Bsal* killing ability, which together with the prominent bands on the SDS-PAGE gel suggest the presence of one or several bioactive proteins. Mass spectrometry revealed the presence of proteins but unfortunately, identification of candidate bioactive proteins by LCMSMS mass spectrometry in the skin secretions was unsuccessful due to poor proteomic coverage of our model species. However, several antimicrobial and cytotoxic proteins (in the range of 6 to 72 kDa) like bactericidal proteins, lysozymes, lectins, protease inhibitors and  $\beta$ -crystallins have been characterized in the skin secretions of a wide range of frog species [77–80] and analogous compounds may be present in the understudied secretions of urodelans. Future studies using a combination of transcriptomics (e.g. RNAseq of the skin), proteomics and genomics could help identify candidate immune compounds, and thereby broaden our knowledge on salamander innate immunity.

In our case, fire salamander mucosome function mirrors the susceptibility of *Bd* and *Bsal* reported from wild animals and experimental data more accurately than the salamander's secretions. This is further exemplified by the congruence between the mucosome activity and *Bsal* susceptibility of our other tested salamander species. Although increased secretion of granular gland contents is well known in a state of acute stress (e.g. during a predator threat) [42,52,53], evidence for increased secretion during the initial state of infection remains scarce and inconclusive. It seems logical to study constitutive skin defenses, particularly as the mucosome of amphibians has been shown to contain many factors that can affect chytrid viability. Although the study of skin secretions has proven its immense value for understanding amphibian immunity and skin defenses, our case shows that incorporating mucosome data can result in a more holistic view when studying host susceptibility.

The fact that mucosome activity of captive and wild fire salamanders is highly comparable, indicates that our data obtained from captive animals is biologically relevant, mirroring the conditions found in the wild. Mucosomes as predictors of *Bsal* susceptibility could be used as a crude first step in identifying highly susceptible species or resistant species without the use of infection trials. This method could be of particular importance with endangered species, where sacrificing animals for an infection trail is not possible.

Our study is the first to investigate skin defenses of urodelans against the recently emerged pathogen *Bsal*. We find that skin defenses could play a role in protecting salamanders from this pathogen, which represents an important step towards understanding species variation in disease susceptibility. As the introduction of *Bsal* poses a great risk to native salamander communities, increased knowledge of susceptibility could aid in conservation efforts enabling more focused and effective conservation strategies.

## Supporting information

**S1 Fig. Fire salamander secretions SDS-PAGE gel.**  
(PDF)

**S1 Appendix. Tables A–C *Bd* and *Bsal* zoospore assay results.**  
(PDF)

## Acknowledgments

Financial support for this research was provided via the UGent GOA project Scaling up Functional Biodiversity Research: from Individuals to Landscapes and Back (TREEWEB). We would like to thank Tijn Raaymakers for suggestions during early version of this manuscript and Alex Laking and Elin Verbrugghe for help during experiments. We are grateful to the three anonymous reviewers whose comments greatly improved the initial manuscript.

## Author Contributions

**Conceptualization:** Hannah Keely Smith, Frank Pasmans, An Martel.

**Data curation:** Hannah Keely Smith, Maarten Dhaenens, Dieter Deforce.

**Formal analysis:** Hannah Keely Smith, Maarten Dhaenens, Dieter Deforce, An Martel.

**Funding acquisition:** Frank Pasmans, Dries Bonte, Kris Verheyen, Luc Lens, An Martel.

**Investigation:** Hannah Keely Smith, Maarten Dhaenens, Dieter Deforce.

**Methodology:** Hannah Keely Smith, Frank Pasmans, Maarten Dhaenens, Dieter Deforce, An Martel.

**Project administration:** Frank Pasmans, Dries Bonte, Kris Verheyen, Luc Lens, An Martel.

**Resources:** Frank Pasmans, Dries Bonte, Kris Verheyen, Luc Lens, An Martel.

**Supervision:** Frank Pasmans, An Martel.

**Validation:** Hannah Keely Smith.

**Visualization:** Hannah Keely Smith, Frank Pasmans, An Martel.

**Writing – original draft:** Hannah Keely Smith.

**Writing – review & editing:** Frank Pasmans, Dries Bonte, Kris Verheyen, Luc Lens, An Martel.

## References

1. Daszak P. Emerging infectious diseases of wildlife—threats to biodiversity and human health. *Science*. 2014; 287(443):443–449.

2. Fisher MC, Henk DA, Briggs CJ, Brownstein JS, Mandoff LC, McCraw SL, et al. Emerging fungal threats to animal, plant and ecosystem. *Nature*. 2012; 484:186–194. <https://doi.org/10.1038/nature10947> PMID: 22498624
3. Lips KR. Decline of a tropical montane amphibian fauna. *Conservation Biology*. 1998; 12(1): 106–117.
4. Stuart SN. Status and trends of amphibian declines and extinctions worldwide. *Science*. 2004; 306(5702):1783–1786. <https://doi.org/10.1126/science.1103538> PMID: 15486254
5. Wake DB, Vredenburg VT. Are we in the midst of the sixth mass extinction? A view from the world of amphibians. *Proceedings of the National Academy of Sciences*. 2008; 105(Supplement 1):11466–11473.
6. Berger L, Speare R, Daszak P, Green DE, Cunningham AA, Goggin CL, et al. Chytridiomycosis causes amphibian mortality associated with population declines in the rain forests of Australia and Central America. *Proceedings of the National Academy of Sciences of the United States of America*. 1998; 95(15): 9031–9036. PMID: 9671799
7. Bosch J, Martínez-Solano I, García-París M. Evidence of a chytrid fungus infection involved in the decline of the common midwife toad (*Alytes obstetricans*) in protected areas of central Spain. *Biological Conservation*, 2001; 97(3):331–337.
8. Muths E, Corn PS, Pessier P, Green DE. Evidence for disease related amphibian decline in Colorado. *Biological Conservation*. 2003; 110:357–365.
9. Rachowicz LJ, Knapp RA, Morgan JAT, Stice MJ, Vredenburg VT, Parker JM, et al. Emerging infectious disease as a proximate cause of amphibian mass mortality. *Ecology*. 2006; 87(7):1671–1683. PMID: 16922318
10. Lips KR, Brem F, Brene R, Reeve JD, Alford RA, Voyles J, et al. Emerging infectious disease and the loss of biodiversity in a Neotropical amphibian community. *Proceedings of the National Academy of Sciences*. 2006; 103(9):3165–3170.
11. Lötters S, Kielgast J, Bielby J, Schmidlein S, Bosch J, Veith M, et al. The link between rapid enigmatic amphibian decline and the globally emerging chytrid fungus. *EcoHealth*. 2009; 6(3):358–372. <https://doi.org/10.1007/s10393-010-0281-6> PMID: 20224980
12. Cheng TL, Rovito SM, Wake DB, Vredenburg VT. Coincident mass extirpation of Neotropical amphibians with the emergence of the infectious fungal pathogen *Batrachochytrium dendrobatidis*. *Proceedings of the National Academy of Sciences of the United States of America*. 2011; 108(23):1–6.
13. Martel A, Spitzen-van der Sluijs A, Blooi M, Bert W, Ducatelle R, Fischer MC, et al. *Batrachochytrium salamandrivorans* sp. nov. causes lethal chytridiomycosis in amphibians. *Proceedings of the National Academy of Sciences of the United States of America*. 2013; 110(38):15325–9. <https://doi.org/10.1073/pnas.1307356110> PMID: 24003137
14. Spitzen-der Sluijs A, Spikmans F, Bosman W, de Zeeu M, Van der Meij T, Goverse E, et al. Rapid enigmatic decline drives the fire salamander (*Salamandra salamandra*) to the edge of extinction in the Netherlands. *Amphibia-Reptilia*. 2013; 34(233).
15. Stegen G, Pasmans F, Schmidt BR, Rouffaer, Van Praet S, Schaub M, et al. Drivers of salamander extirpation mediated by *Batrachochytrium salamandrivorans*. *Nature*. 2017; 544(7650):353–356. <https://doi.org/10.1038/nature22059> PMID: 28425998
16. Spitzen-van der Sluijs A, Martel A, Asselberghs J, Bales EK, Beukema W, Bletz MC, et al. Expanding distribution of lethal amphibian fungus *Batrachochytrium salamandrivorans* in Europe. *Emerging Infectious Diseases*. 2016; 22(7): 1286–1288. <https://doi.org/10.3201/eid2207.160109> PMID: 27070102
17. Martel A, Blooi M, Adriaensen C, Van Rooij P, Beukema W, Fisher MC, et al. Recent introduction of a chytrid fungus endangers Western Palearctic salamanders. *Science*. 2014; 346(6209) 630–631. <https://doi.org/10.1126/science.1258268> PMID: 25359973
18. Laking AE, Ngo HN, Pasmans F, Martel A, Nguyen TT. *Batrachochytrium salamandrivorans* is the predominant chytrid fungus in Vietnamese salamanders. *Scientific Reports*. 2017; 7(44443).
19. Grant EHC, Muths E, Katz RA, Canessa S, Adams MJ, Ballard JR, et al. Using decision analysis to support proactive management of emerging infectious wildlife diseases. *Frontiers in Ecology and the Environment*. 2017; 15(4): 214–221.
20. Yap TA, Nguyen NT, Serr M, Shepack A, Vredenburg VT. *Batrachochytrium salamandrivorans* and the risk of a second amphibian pandemic. *Ecohealth*. 2017; 1–14. <https://doi.org/10.1007/s10393-017-1220-6>
21. Searle CL, Gervasi SS, Hua J, Hammond JI, Relyea RA, Olson DH, et al. Differential host susceptibility to *Batrachochytrium dendrobatidis*, an emerging amphibian pathogen. *Conservation Biology*. 2011; 25(5):965–974. <https://doi.org/10.1111/j.1523-1739.2011.01708.x> PMID: 21732979

22. Savage AE, Zamudio KR. Adaptive tolerance to a pathogenic fungus drives major histocompatibility complex evolution in natural amphibian populations. *The Royal Society Proceedings Biological Sciences*. 2016; 283(1827):2015–31 15.
23. Becker MH, Harris RN. Cutaneous bacteria of the Redback salamander prevent morbidity associated with a lethal disease. *PLoS ONE*. 2010; 5(6): 1–6.
24. Rosenthal M, Goldber D, Aiello A, Larson E, Foxman B. Skin microbiota: microbial community structure and its potential association with health and disease. *Infection, Genetics and Evolution*. 2011; 11(5):839–848. <https://doi.org/10.1016/j.meegid.2011.03.022> PMID: 21463709
25. Vredenburg VT, Briggs CJ, Harris RN. Host-pathogen dynamics of amphibian chytridiomycosis: the role of the skin microbiome in health and disease. *The National Academies Press*, Washington, DC. 2011. pp 342–355.
26. Tobler U, Schmidt BR. Within- and among-population variation in chytridiomycosis-induced mortality in the toad *Alytes obstetricans*. *PLoS ONE*. 2010; 5(6):1–8.
27. Walker SF, Bosch J, Gomez V, Garner TWJ, Cunningham AA, Schmeller DS, et al. Factors driving pathogenicity vs. prevalence of amphibian panzootic chytridiomycosis in Iberia. *Ecology Letters*. 2010; 13(3):372–382. <https://doi.org/10.1111/j.1461-0248.2009.01434.x> PMID: 20132274
28. Murray KA, Skerratt LF, Garland S, Kriticos D, McCallum H. Whether the weather drives patterns of endemic amphibian chytridiomycosis: a pathogen proliferation approach. *PLoS ONE*. 2013; 8(4).
29. Rollins-Smith LA. The role of amphibian antimicrobial peptides in protection of amphibians from pathogens linked to global amphibian declines. *Biochimica et Biophysica Acta—Biomembranes*. 2009; 1788(8):1593–1599.
30. Heatwhole H, Barthalamus GT. *Amphibian Biology*, Vol 1. Surrey Beaty and Sons, Chipping Norton. 1994.
31. Voyles S, Young S, Berger L, Campbell C, Voyles WF, Dinudom A, et al. Pathogenesis of chytridiomycosis, a cause of catastrophic amphibian declines. *Science*. 2009; 326(5952):582–585. <https://doi.org/10.1126/science.1176765> PMID: 19900897
32. Brutyn M, D'Herde K, Dhaenens M, Van Rooij P, Verbrugghe E, Hyatt AD, et al. *Batrachochytrium dendrobatidis* zoospore secretions rapidly disturb intercellular junctions in frog skin. *Fungal Genetic Biology*. 2012; 49(10):830–837.
33. Daly JW, Spande TF, Garraffo HM. Alkaloids from amphibian skin: A tabulation of over eight-hundred compounds. *Journal of Natural Products*. 2005; 68(10):1556–1575. <https://doi.org/10.1021/np0580560> PMID: 16252926
34. Mebs D, Pogoda W. Variability of alkaloids in the skin secretion of the European fire salamander (*Salamandra salamandra terrestris*). *Toxicon*. 2005; 45(5):603–6. <https://doi.org/10.1016/j.toxicon.2005.01.001> PMID: 15777956
35. Roseghini M, Falconieri Erspamer G, Severini C, Simmaco M. Biogenic amines and active prptides in extracts of the skin of thirty-two European amphibian species. *Comparative Biochemistry and Physiology*. 1989; 94(2):455–460.
36. Tsuruda K, Arakawa O, Kawatsu K, Hamano Y, Takatani T, Noguchi T. Secretory glands of tetrodotoxin in the skin of the Japanese newt *Cynops pyrrhogaster*. *Toxicon*. 2002; 40(2):131–6. PMID: 11689234
37. Vences M, Sanchez E, Hauswaldt JS, Eikelmann D, Rodríguez A, Carranza S, et al. Nuclear and mitochondrial multilocus phylogeny and survey of alkaloid content in true salamanders of the genus *Salamandra* (Salamandridae). *Molecular Phylogenetics and Evolution*. 2014; 73(1):208–16.
38. Yotsu-Yamashita M, Mebs D, Kwet A, Schneider M. Tetrodotoxin and its analogue 6-epitetrodotoxin in newts (*Triturus* spp.; Urodela, Salamandridae) from southern Germany. *Toxicon*. 2007; 50(2):306–9. <https://doi.org/10.1016/j.toxicon.2007.03.019> PMID: 17507070
39. Yotsu-Yamashita M, Toennes SW, Mebs D. Tetrodotoxin in Asian newts (Salamandridae). *Toxicon*. 2017; 134:14–7. <https://doi.org/10.1016/j.toxicon.2017.05.014> PMID: 28528177
40. Duellman WE, Trueb L. *Biology of amphibians*. Johns Hopkins University Press, Balitmore. 1986.
41. Brodie ED Jr, Neal S. The antipredator arsenal of fire salamanders: spraying of secretions from highly pressurized dorsal skin glands. *Herpetologica*. 1990; 46(1):1–7.
42. Pask JD, Woodhams DC, Rollins-Smith LA. The ebb and flow of antimicrobial skin peptides defends Northern Leopard frogs (*Rana pipiens*) against chytridiomycosis. *Global Change Biology*. 2012; 18(4):1231–1238.
43. Lauer A, Simon MA, Banning JL, André E, Duncan K, Harris RN. Common cutaneous bacteria from the Eastern Red-Backed salamander can inhibit pathogenic fungi. *Copeia*. 200; (3):630–640.

44. Lauer A, Simon MA, Banning JL, Lam BA, Harris RN. Diversity of cutaneous bacteria with antifungal activity isolated from female Four-Toed salamanders. *The ISME Journal*. 2008; 2(2):145–157. <https://doi.org/10.1038/ismej.2007.110> PMID: 18079731
45. Harris RN, Lauer A, Simon MA, Banning JL, Alford RA. Addition of antifungal skin bacteria to salamanders ameliorates the effects of Chytridiomycosis. *Diseases of Aquatic Organisms*. 2009; 83(1):11–16. <https://doi.org/10.3354/dao02004> PMID: 19301631
46. Woodhams DC, Brandt H, Baumgartner S, Kielgast J, K pfer E, Tobler U, et al. Interacting symbionts and immunity in the amphibian skin mucosome predict disease risk and probiotic effectiveness. *PLoS ONE*. 2014; 9(4).
47. Wells KD. *The ecology and behavior of amphibians*. University of Chicago Press. 2007.
48. Conlon JM. Structural diversity and species distribution of host-defense peptides in frog skin secretions. *Cellular and Molecular Life Sciences*. 2011; 68(13):2303–2315. <https://doi.org/10.1007/s00018-011-0720-8> PMID: 21560068
49. Rollins-Smith LA, Conlon JM. Antimicrobial peptide defenses against chytridiomycosis, an emerging infectious disease of amphibian populations. *Developmental and Comparative Immunology*. 2005; 29(7):589–598. <https://doi.org/10.1016/j.dci.2004.11.004> PMID: 15784290
50. Rollins-Smith LA, Woodhams DC, Reinert LK, Vredenburg VT, Briggs CJ, Nielsen PF, et al. Antimicrobial peptide defenses of the Mountain Yellow-legged frog (*Rana muscosa*). *Developmental and Comparative Immunology*. 2006; 30(9):831–842. <https://doi.org/10.1016/j.dci.2005.10.005> PMID: 16330099
51. Woodhams DC, Rollins-Smith LA, Alford RA, Simon MA, Harris RN. Innate immune defenses of amphibian skin: antimicrobial peptides and more. *Animal Conservation*. 2007; 10(4):425–428.
52. Clarke BT. The natural history of amphibian skin secretions, their normal functioning and potential medical applications. *Biological Review*. 1997; 72:365–37.
53. Toledo RC, Jared C. Cutaneous granular glands and amphibian venoms. *Comparative Biochemistry and Physiology—Part A: Physiology*. 1995; 111(1):1–29.
54. von Byern J, Mebs D, Heiss E, Dicke U, Wetjen O, Bakkegard K, et al. Salamanders on the bench—A biocompatibility study of salamander skin secretions in cell cultures. *Toxicol*. 2017; 135:24–32. <https://doi.org/10.1016/j.toxicol.2017.05.021> PMID: 28551363
55. Habermehl G, Spiterler G. Massenspektren der salamander-alkaloide. *Justus Liebigs Annalen de Chemie*. 1967; 706:213–222.
56. Sch pfer C. Die konstitution der salamander-alkaloide. *Experientia*. 1961; 17: 285–328.
57. Pasmans F, Van Rooij P, Blooi M, Tessa G, Bogaerts S, Sotgiu G, et al. Resistance to Chytridiomycosis in European Plethodontid salamanders of the genus *Speleomantes*. *PLoS One*. 2013; 8(5):1–6.
58. Sheafor B, Davidson EW, Parr L, Rollins-Smith L. Antimicrobial peptide defenses in the salamander, *Ambystoma Tigrinum*, against emerging amphibian pathogens. *Journal of Wildlife Diseases*. 2008; 44(2):226–36. <https://doi.org/10.7589/0090-3558-44.2.226> PMID: 18436656
59. Meng P, Yang S, Shen C, Jiang K, Rong M, Lai R. The first salamander defensin antimicrobial peptide. *PLoS One*. 2013; 8(12):1–5.
60. Van Rooij P, Martel A, Haesebrouck F, Pasmans F. Amphibian Chytridiomycosis: a review with focus on fungus-host interactions. *Veterinary Research*. 2015; 46(1):1–22.
61. Spight TM. The water economy of salamanders: water uptake after dehydration. *Comparative Biochemical Physiology*. 1967; 20:767–771.
62. McMahon TA, Rohr JR. Trypan blue dye is an effective and inexpensive way to determine the viability of *Batrachochytrium dendrobatidis* zoospores. *EcoHealth*. 2014; 11(2): 164–167. <https://doi.org/10.1007/s10393-014-0908-0> PMID: 24519684
63. Bosch J, Mart nez-Solano I. Chytrid fungus infection related to unusual mortalities of *Salamandra salamandra* and *Bufo bufo* in the Pe alara Natural Park, Spain. *Oryx*. 2006; 40(1): 84.
64. Farrer RA, Martel A, Verbrugghe E, Abouelleil A, Ducatelle R, Longcore JE, et al. Genomic innovations linked to infection strategies across emerging pathogenic chytrid fungi. *Nature Communication*. 2017; 8:1–11.
65. Lam BA, Walton DB, Harris RN. Motile zoospores of *Batrachochytrium dendrobatidis* move away from antifungal metabolites produced by amphibian skin bacteria. *EcoHealth*. 2011; 8(1):36–45. <https://doi.org/10.1007/s10393-011-0689-7> PMID: 21769695
66. Myers JM, Ramsey JP, Blackman AL, Nichols AE, Minbiole KPC, Harris RN. Synergistic inhibition of the lethal fungal pathogen *Batrachochytrium dendrobatidis*: the combined effect of symbiotic bacterial metabolites and antimicrobial peptides of the frog *Rana muscosa*. *Journal of Chemical Ecology*. 2012; 38(8):958–965. <https://doi.org/10.1007/s10886-012-0170-2> PMID: 22914957



67. Loudon AH, Holland J, Umile TP, Burzynski EA, Minbiole KPC, Harris RN. Interactions between amphibians' symbiotic bacteria cause the production of emergent anti-fungal metabolites. *Frontiers in Microbiology*. 2014; 5(441):1–8.
68. Becker MH, Harris RN, Minbiole KPC, Schwantes CR, Rollins-Smith LA, Reinert LK, et al. Towards a better understanding of the use of probiotics for preventing Chytridiomycosis in Panamanian Golden frogs. *Ecohealth*. 2011; 8(4):501–6. <https://doi.org/10.1007/s10393-012-0743-0> PMID: 22328095
69. Becker MH, Walke JB, Murrill L, Woodhams DC, Reinert LK, Rollins-Smith LA, et al. Phylogenetic distribution of symbiotic bacteria from Panamanian amphibians that inhibit growth of the lethal fungal pathogen *Batrachochytrium dendrobatidis*. *Molecular Ecology*. 2015; 24(7):1628–41. <https://doi.org/10.1111/mec.13135> PMID: 25737297
70. Bletz MC, Perl RGB, Vences M. Skin microbiota differs drastically between co-occurring frogs and newts. *Royal Society Open Science*. 2017; 4(4):170107. <https://doi.org/10.1098/rsos.170107> PMID: 28484639
71. Sabino-Pinto J, Bletz MC, Islam MM, Shimizu N, Bhujju S, Geffers R, et al. Composition of the cutaneous bacterial community in Japanese amphibians: effects of captivity, host species, and body region. *Microbial Ecology*. 2016; 72(2):460–9. <https://doi.org/10.1007/s00248-016-0797-6> PMID: 27278778
72. Sanchez E, Bletz MC, Dunsch L, Bhujju S, Geffers R, Jarek M, et al. Cutaneous bacterial communities of a poisonous salamander: a perspective from life stages, body parts and environmental conditions. *Microbial Ecology*. 2017; 73(2):455–65. <https://doi.org/10.1007/s00248-016-0863-0> PMID: 27677894
73. Brucker RM, Baylor CM, Walters RL, Lauer A, Harris RN, Minbiole KPC. The identification of 2,4-diacetylphloroglucinol as an antifungal metabolite produced by cutaneous bacteria of the salamander *Plethodon cinereus*. *Journal of Chemical Ecology*. 2008; 34(1):39–43. <https://doi.org/10.1007/s10886-007-9352-8> PMID: 18058176
74. Brucker RM, Harris RN, Schwantes CR, Gallaher TN, Flaherty DC, Lam BA, et al. Amphibian chemical defense: antifungal metabolites of the microsymbiont *Janthinobacterium lividum* on the salamander *Plethodon cinereus*. *Journal of Chemical Ecology*. 2008; 34(11):1422–9. <https://doi.org/10.1007/s10886-008-9555-7> PMID: 18949519
75. Becker MH, Brucker RM, Schwantes CR, Harris RN, Minbiole KPC. The bacterially produced metabolite violacein is associated with survival of amphibians infected with a lethal fungus. *Applied Environmental Microbiology*. 2009; 75(21):6635–6638. <https://doi.org/10.1128/AEM.01294-09> PMID: 19717627
76. Loudon AH, Holland JA, Umile TP, Burzynski EA, Minbiole KPC, Harris RN. Interactions between amphibians' symbiotic bacteria cause the production of emergent anti-fungal metabolites. *Frontier in Microbiology*. 2014; 5:1–8.
77. Mastromei G, Barberio C, Pistolesi S. A bacterial protein in *Bombina variegata pachypus* skin venom. *Toxin*. 1991; 29(3):321–328.
78. Riera AS, Daud A, Gallo A, Gent S, Aybar M, Sánchez S. Antibacterial activity of lactose-binding lectins from *Bufo arenarum* skin. *Biocell*. 2003; 27(1):37–46. PMID: 12847913
79. Zhao Y, Jin Y, Lee WH, Zhang Y. Purification of a lysozyme from skin secretions of *Bufo andrewsi*. *Comparative Biochemistry and Physiology—C Toxicology and Pharmacology*. 2006; 142(1–2):46–52.
80. Qian JQ, Liu SB, He YY, Lee WH, Zhang Y. Acute toxicity of  $\beta\gamma$ -CAT, a naturally existing non-lens  $\beta\gamma$ -crystallin and trefoil factor complex from frog *Bombina maxima* skin secretions. *Toxicol*. 2008; 52(1):22–31. <https://doi.org/10.1016/j.toxicol.2008.05.007> PMID: 18588908
